# Supplementary material for: Best of Both Worlds: Simultaneous High-Light and Shade-Tolerance Adaptations within Individual Leaves of the Living Stone Lithops aucampiae
Source: PLOS journal article supplement (doi:10.1371/journal.pone.0075671), 2013-10-23
Supplement: S1 (10.1371/journal.pone.0075671.s001) [file journal.pone.0075671.s001]

**Best of both worlds: Simultaneous high-light and shade-tolerance adaptations within individual leaves of the living stone *Lithops aucampiae***

*Katie J. Field, Rachel George, Brian Fearn, W. Paul Quick and Matthew P. Davey*

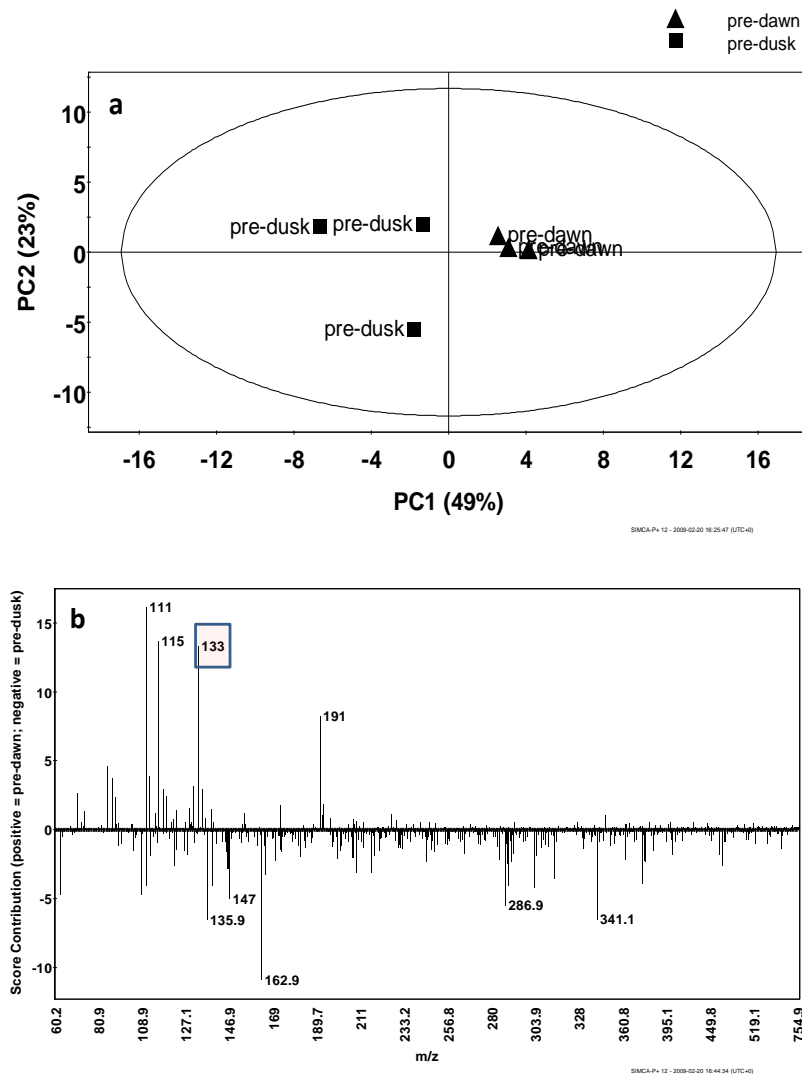

**Figure S1.** Principal component analysis (PCA) score scatter plot (a) of the metabolic fingerprinting data (direct injection mass spectrometry  $m/z$  values) obtained from *Lithops aucampiae* sampled at pre-dusk and pre-dawn. The percent of the variation explained by each component is given. (b) molecular mass ions ( $m/z$ ) differing the most between pre-dusk and pre-dawn samples. The molecular weight of malate is highlighted.
